# Supplementary figures and images for: Ordered arrangement of dendrites within a C. elegans sensory nerve bundle
Source: eLife journal article supplement (doi:10.7554/elife.35825), 2018-08-17

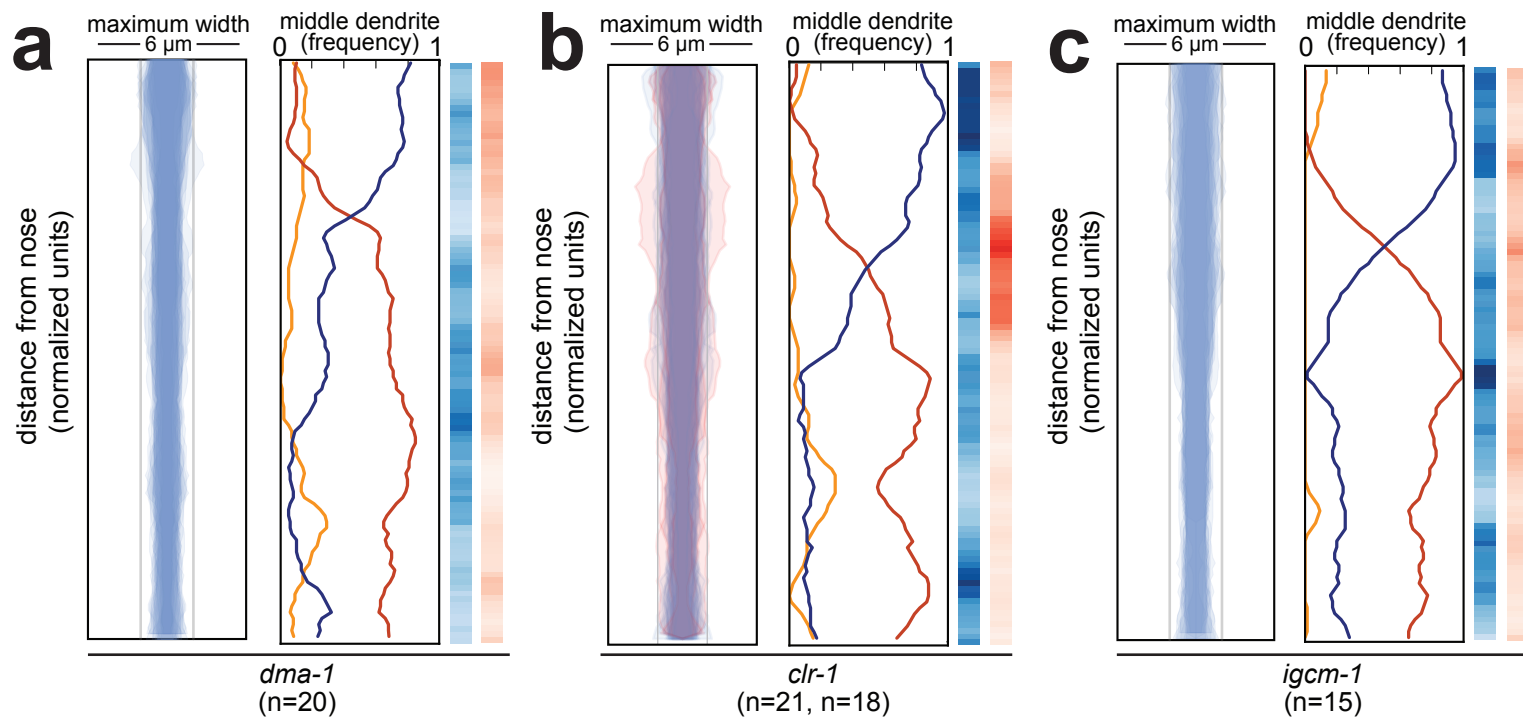

Supplement: supp [file elife-35825-supp-v2.zip]

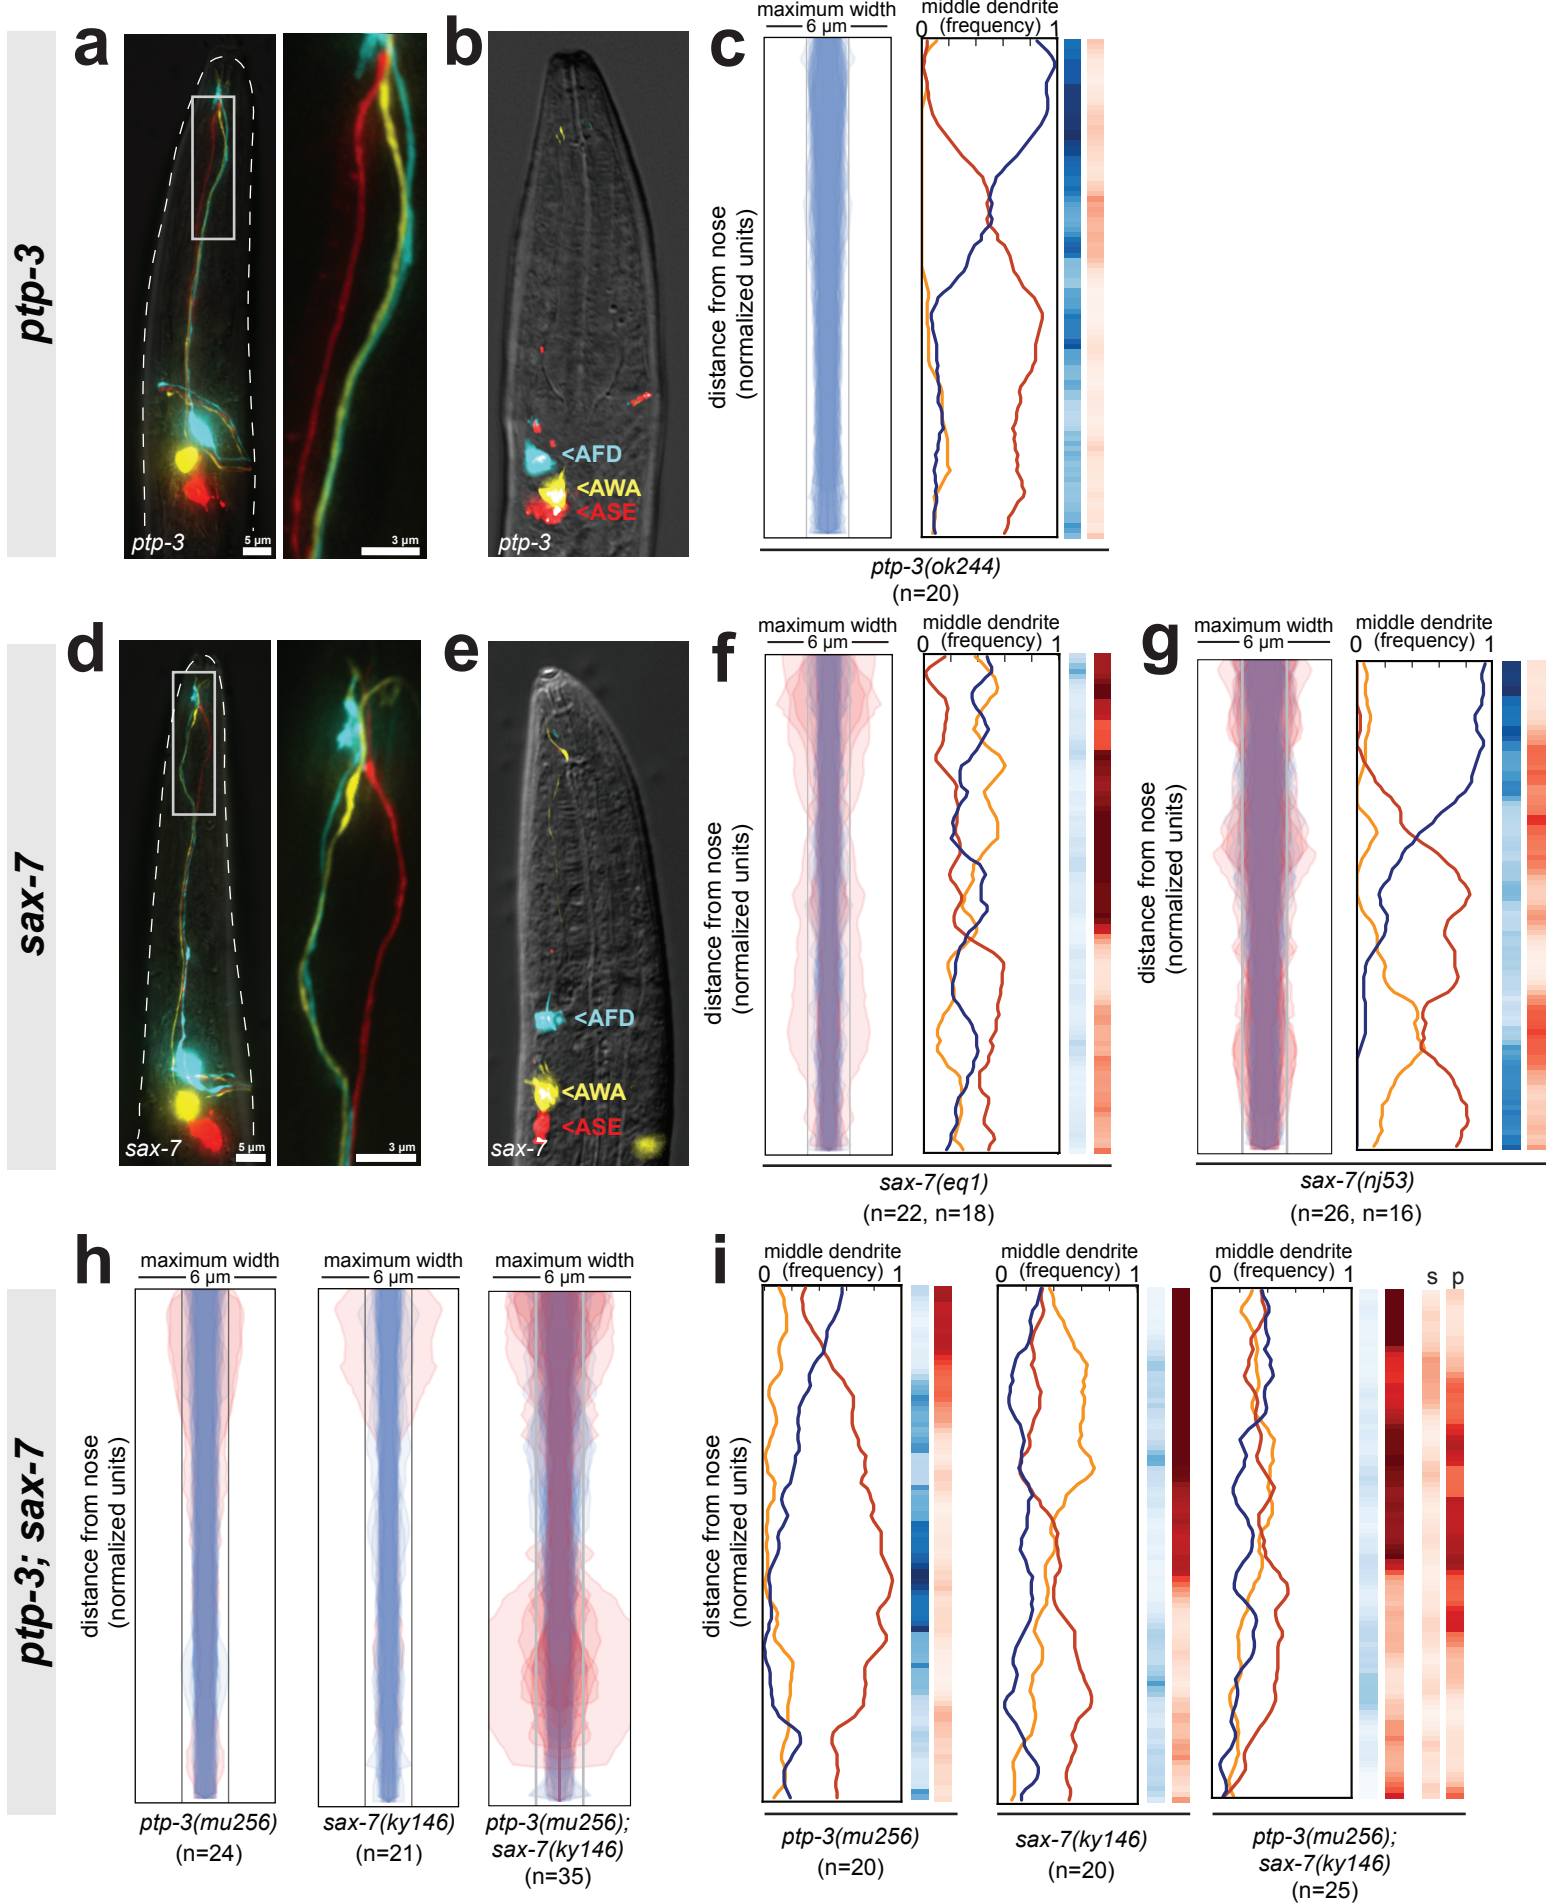

Supplement: supp [file elife-35825-supp-v2.zip]

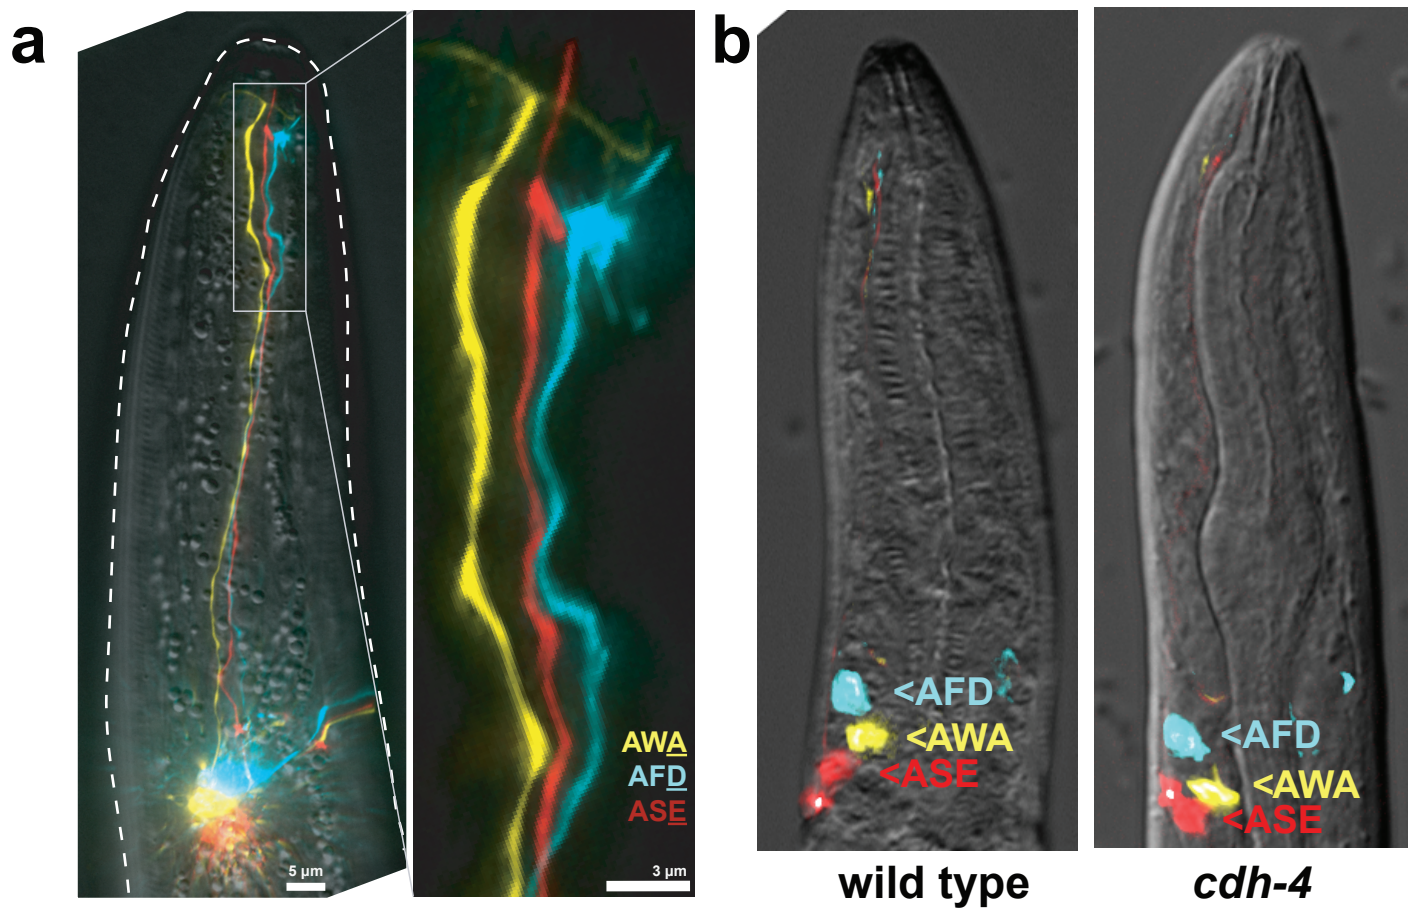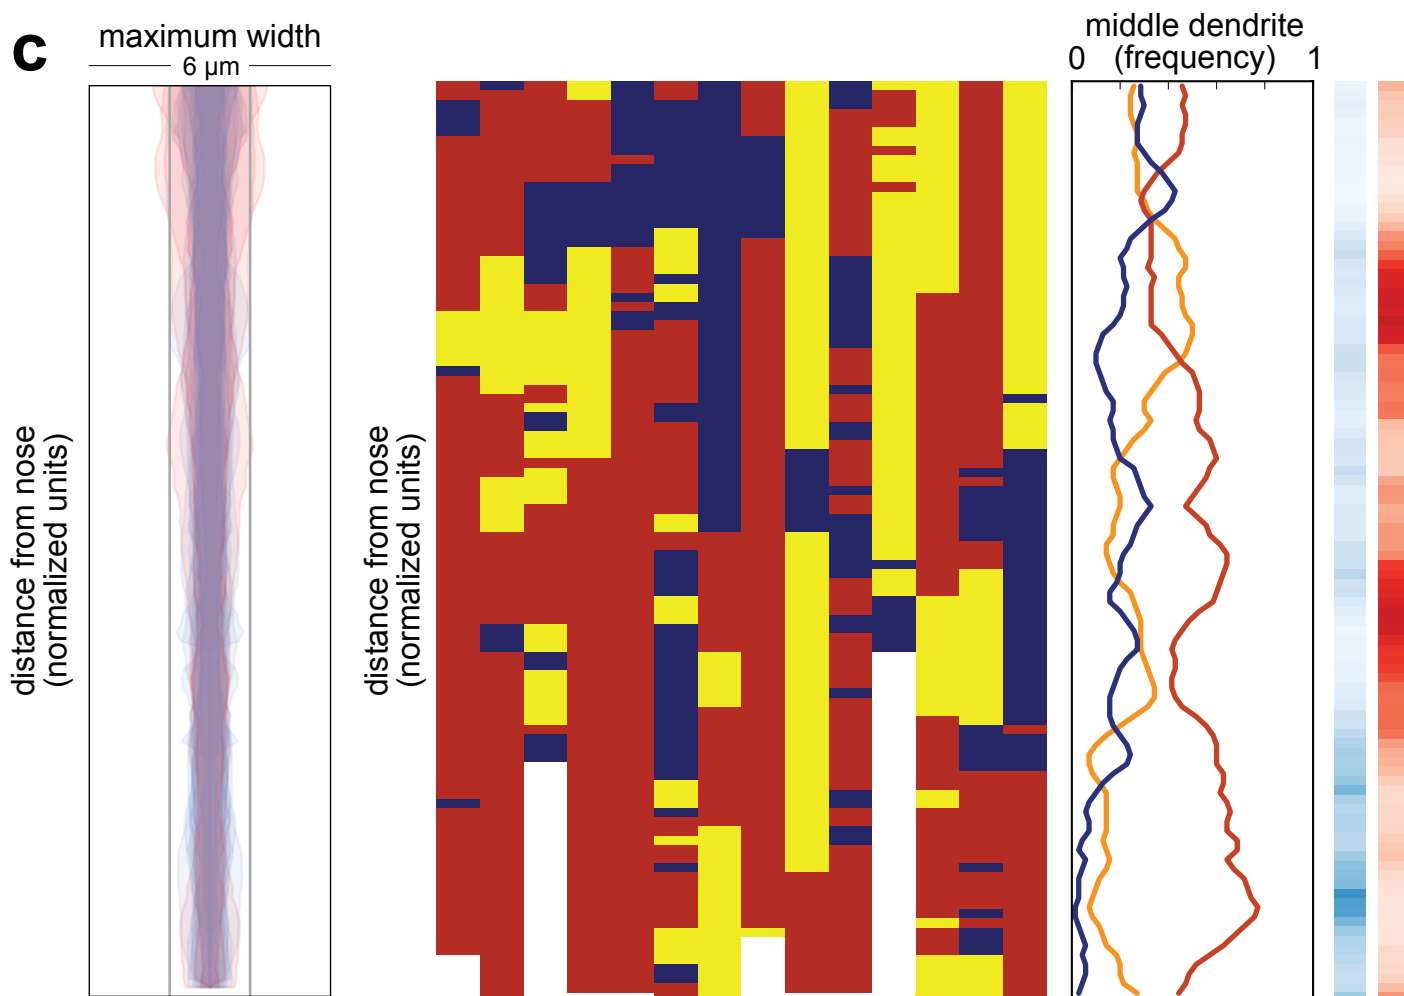

Supplement: supp [file elife-35825-supp-v2.zip]

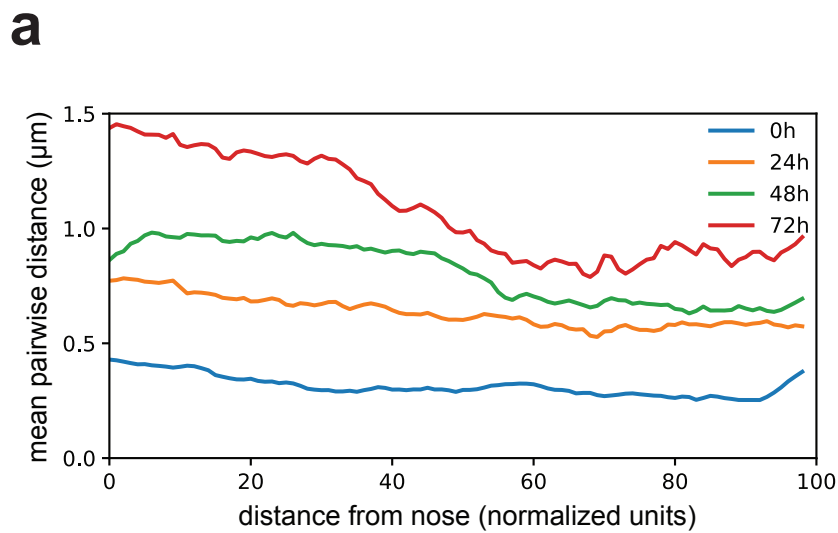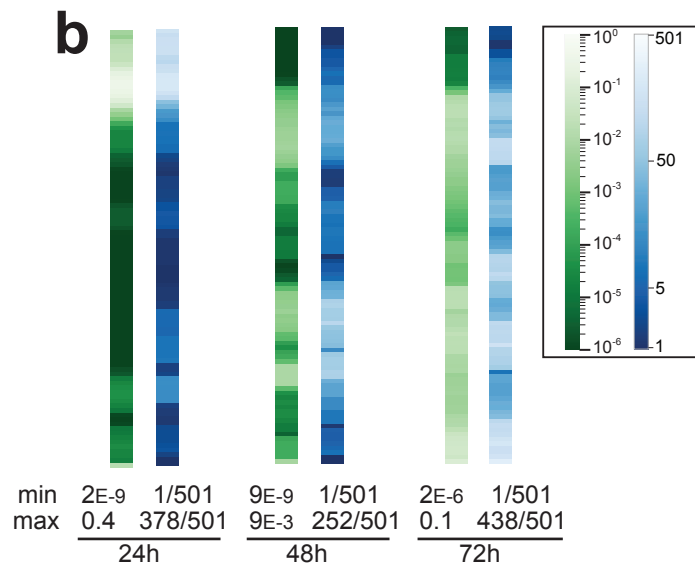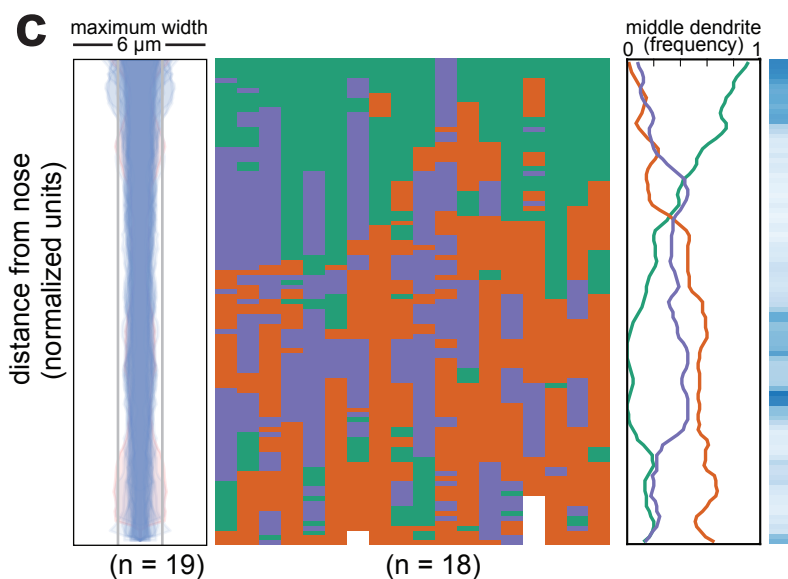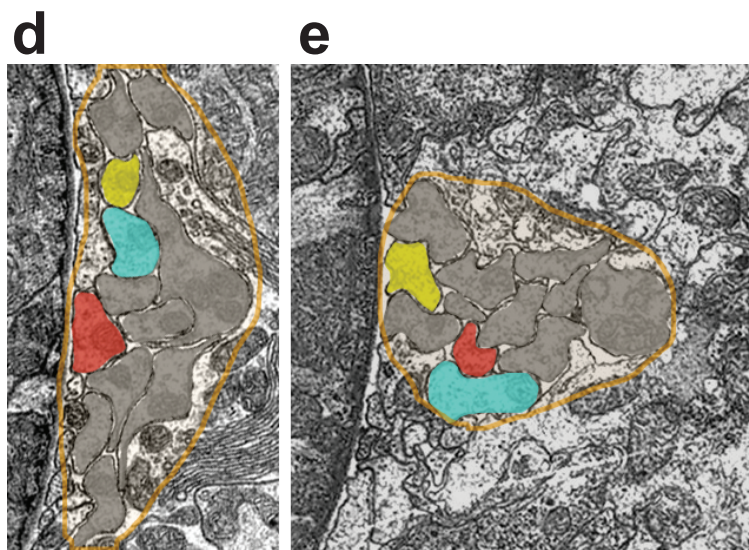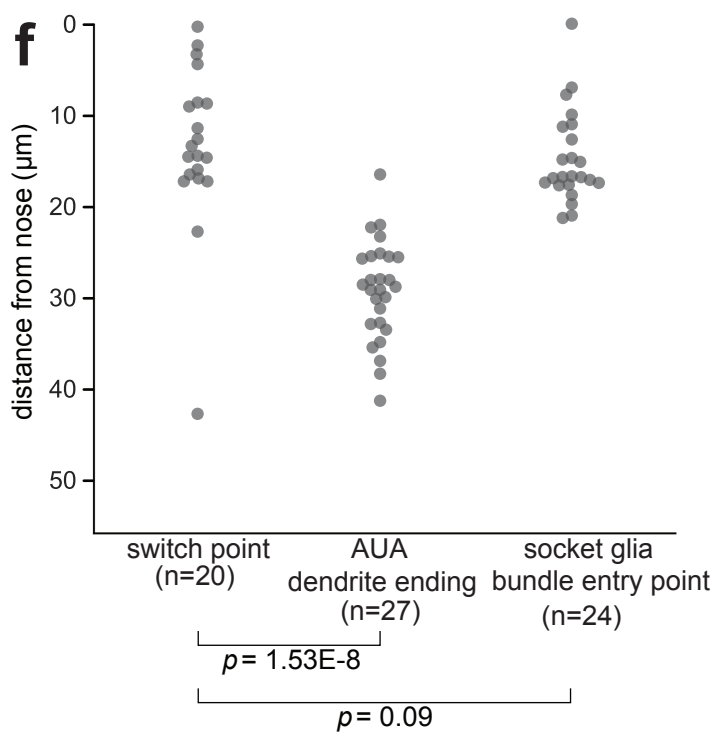

Supplement: supp [file elife-35825-supp-v2.zip]

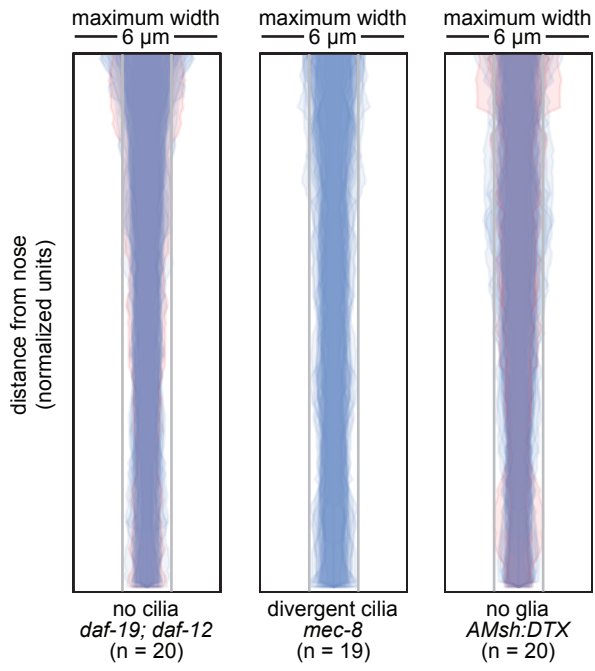

Supplement: supp [file elife-35825-supp-v2.zip]
